1  
2  
3  
4  
5  
6  
7  
8  
9  
10  
11  
12  
13  
14  
15  
16  
17  
18  
19  
20  
21  
22  
23  
24  
25  
26

***Paucimyces polynucleatus* gen. nov, sp. nov., a novel polycentric genus of anaerobic gut fungi from the feces of a wild blackbuck antelope**

Radwa A. Hanafy, Noha H. Youssef, and Mostafa Elshahed\*

Department of Microbiology and Molecular Genetics, Oklahoma State University, Stillwater, OK 74074

**Running Title:** Novel polycentric anaerobic fungus from herbivores

\* Corresponding author: Address 1110 S. Innovation way, Stillwater, OK. Phone: +1 (405) 744-3005. Email: Mostafa@Okstate.edu

27 **Abstract**

28 The anaerobic gut fungi (AGF, phylum Neocallimastigomycota) reside in the alimentary tracts of  
29 herbivores. Multiple novel, yet-uncultured AGF taxa have recently been identified in culture-  
30 independent diversity surveys. Here, we report on the isolation and characterization of the first  
31 representative of the RH5 lineage from fecal samples of a wild blackbuck (Indian Antelope)  
32 from Sutton County, Texas, USA. The isolates displayed medium sized (2-4 mm) compact  
33 circular colonies on agar roll tubes and thin loose biofilm-like growth in liquid medium.  
34 Microscopic examination revealed monoflagellated zoospores and polycentric thalli with highly  
35 branched nucleated filamentous rhizomycelium, a growth pattern encountered in a minority of  
36 described AGF genera so far. The obtained isolates are characterized by formation of spherical  
37 vesicles at the hyphal tips from which multiple sporangia formed either directly on the spherical  
38 vesicles or at the end of sporangiophores. Phylogenetic analysis using the D1/D2 regions of the  
39 large ribosomal subunit (D/D2 LSU) and the ribosomal internal transcribed spacer 1 (ITS1)  
40 revealed sequence similarities of 93.5%, and 81.3%, respectively, to the closest cultured relatives  
41 (*Orpinomyces joyonii* strain D3A (D1/D2 LSU), and *Joblinomyces apicalis* strain GFH681  
42 (ITS1). Substrate utilization experiments using the type strain (BB-3) demonstrated growth  
43 capabilities on a wide range of mono-, oligo-, and polysaccharides, including glucose, xylose,  
44 mannose, fructose, cellobiose, sucrose, maltose, trehalose, lactose, cellulose, xylan, starch, and  
45 raffinose. We propose accommodating these novel isolates in a new genus and species, for which  
46 the name *Paucimyces polynucleatus* is proposed. The type species is strain BB-3.

47 **Keywords:** Fungi, Neocallimastigomycota, Herbivores

48

49

## Introduction

50 In the herbivorous gut, a diverse community of bacterial, archaeal, protozoan, and fungal species  
51 synergistically mediate the breakdown of plant biomass (Gruninger et al., 2014). Fungi in the  
52 herbivorous gut belong to a distinct fungal phylum (Neocallimastigomycota) and play a pivotal  
53 role in this process through mechanical and enzymatic means (Hess et al., 2020). Nineteen  
54 anaerobic gut fungal (AGF) genera have been characterized so far (Barr et al., 1989; Breton et  
55 al., 1990; Callaghan et al., 2015; Dagar et al., 2015; Gold et al., 1988; Hanafy et al., 2017;  
56 Hanafy et al., 2018; Hanafy et al., 2020b; Heath et al., 1983; Joshi et al., 2018; Ozkose et al.,  
57 2001; Stabel et al., 2020). However, culture-independent diversity surveys have identified  
58 representatives of multiple yet-uncultured AGF genera (Hanafy et al., 2020a; Kittelmann et al.,  
59 2012; Liggenstoffer et al., 2010). The amenability of such lineages to isolation is uncertain. The  
60 lack of cultured representatives could be a reflection of the complexity and difficulty in isolation  
61 and maintenance of these AGF lineages. Alternatively, it is possible that some yet-uncultured  
62 AGF taxa have complex nutritional requirements that are not satisfied in current media and  
63 isolation procedures.

64 Based on prior evidence (Hanafy et al., 2020a), we hypothesize that success in isolating a  
65 fungal taxon is directly proportional to its relative abundance within a specific sample. As such,  
66 targeting samples assessed to harbor a relatively large fraction of yet-uncultured taxa using  
67 culture-independent approaches should be prioritized in culture-based diversity efforts. During a  
68 recent culture-independent diversity survey of the AGF community in wild, zoo-housed, and  
69 domesticated herbivores in the US states of Oklahoma and Texas, we encountered several  
70 samples that harbored a high proportion of yet-uncultured genus-level clades of AGF (Hanafy et  
71 al., 2020a). We here report on the targeted isolation and detailed characterization of multiple

72 strains belonging to one of these clades (lineage RH5). Morphological, microscopic, and  
73 phylogenetic characterization justifies proposing a novel genus and species to accommodate  
74 these isolates, for which the name *Paucimyces polynucleatus* is proposed.

75

76

## Materials and Methods

77 **Samples.** Fresh fecal samples were collected from a wild blackbuck antelope during a hunting  
78 expedition in Sutton County, Texas, USA in April 2018. All hunters had the appropriate licenses,  
79 and animals were shot either on a private land with the owner's approval or on public land  
80 during the hunting season. Samples were stored on ice and promptly (within 24 hours)  
81 transferred to the laboratory. Upon arrival, a portion of the sample was stored at  $-20^{\circ}\text{C}$ .

82 **Isolation.** A recent culture-independent survey of AGF diversity identified a wide range of novel  
83 yet-uncultured AGF lineages in fecal and rumen samples recovered from multiple herbivores in  
84 the states of Oklahoma and Texas (USA) (Hanafy et al., 2020a). Among the samples surveyed, a  
85 domesticated sheep and a wild blackbuck antelope showed a high relative abundance of the yet-  
86 uncultured lineage RH5 (96.2% and 52.4%, respectively) (Hanafy et al., 2020a). Due to the  
87 unavailability of sufficient feces from the domesticated sheep, isolation efforts were conducted  
88 only on the wild blackbuck antelope as previously described in (Hanafy et al., 2018; Stabel et al.,  
89 2020). Briefly AGF was enriched for 24 h at  $39^{\circ}\text{C}$  in rumen fluid (RF) media (Hanafy et al.,  
90 2017) amended with 0.5% cellobiose as a substrate. Enriched tubes were serially diluted in RF  
91 media supplemented with a (1:1) mixture of cellobiose and switchgrass. Antibiotics mixture (50  
92  $\mu\text{g}/\text{mL}$  penicillin, 20  $\mu\text{g}/\text{mL}$  streptomycin, and 50  $\mu\text{g}/\text{mL}$  chloramphenicol) was added to inhibit  
93 bacterial growth. Dilutions showing visible signs of fungal growth such as clumping and floating  
94 of the switchgrass, and/or production of gas bubbles were used for colony isolation using the roll  
95 tube procedure (Hungate, 1969). Purity of the obtained cultures was ensured by conducting three  
96 rounds of roll tubing and colony picking. Isolates were maintained by bi-weekly sub-culturing  
97 into cellobiose containing RF media. Long-term storage of the obtained isolates was conducted  
98 by surface inoculation on RF-cellobiose agar medium as previously described in (Calkins et al.,

99 2016).

100 **Morphological and microscopic characterization.** Three-day old colonies and liquid cultures  
101 were examined to describe the isolate's growth pattern on solid and liquid media, respectively.  
102 Both light and scanning electron microscopy were utilized to examine different fungal structures  
103 at various stages of growth. For light microscopy, fungal biomass was stained with lactophenol  
104 cotton blue and examined using an Olympus BX51 microscope (Olympus, Center Valley,  
105 Pennsylvania) equipped with a DP71 digital camera (Olympus). Nuclei localization was  
106 examined by staining the samples with 4, 6' diamidino-2-phenylindole (DAPI at final  
107 concentration of 10 µg/ml), followed by incubation in the dark for 10 min at room temperature.  
108 Treated samples were examined with LSM 980 confocal microscope with Airyscan 2 (Carl Zeiss  
109 AG, Oberkochen, Germany). Sample preparation and fixation for scanning electron microscopy  
110 was conducted as previously described (Hanafy et al., 2017; Hanafy et al., 2018). Samples were  
111 examined on a FEI Quanta 600 scanning electron microscope (FEI Technologies Inc., Oregon,  
112 United States).

113 **Substrate utilization.** The substrate utilization capabilities of the type strain BB3 were assessed  
114 by using a rumen-fluid basal medium with no carbon source as previously described (Hanafy et  
115 al., 2017). Growth and viability of a 10% inoculum was compared to a substrate-free medium.  
116 Twenty-four different substrates were tested at a final concentration of 0.5% w/v (Table 1). The  
117 ability of strain BB3 to utilize a specific substrate was considered positive when the tested  
118 substrate supports the culture viability after three successive sub-culturing events.

119 **Phylogenetic analysis and ecological distribution.** Fungal biomass was harvested from actively  
120 growing 3-day old cultures and ground in liquid nitrogen. DNA was extracted from the ground  
121 biomass using DNeasy PowerPlant Pro Kit (Qiagen Corp., Germantown, MD, USA) according

122 to the manufacturer's instructions. The ITS1, 5.8S rRNA, ITS2 and D1/D2 region of the LSU  
123 rRNA was amplified using the primers ITS5 (5' -GGAAGTAAAAGTCGTAACAAGG-3') and  
124 NL4 (5' -TCAACATCCTAAGCGTAGGTA-3') as described previously (Wang et al., 2017).  
125 Amplicons were purified using PureLink® PCR Purification Kit (ThermoFisher Scientific,  
126 Waltham, Massachusetts), and cloned using a TOPO-TA cloning vector according to the  
127 manufacturer's instructions (Life Technologies®, Carlsbad, CA). Three clones were Sanger-  
128 sequenced at the Oklahoma State University DNA sequencing core facility. Regions  
129 corresponding to the ITS1 and D1/D2 LSU regions from the obtained amplicons were aligned to  
130 reference ITS1 and D1/D2 LSU sequences using MAFFT aligner (Kato et al., 2019). Maximum  
131 likelihood phylogenetic trees were constructed in FastTree using *Chytriomycetes* sp. WB235A  
132 isolate AFTOL-ID 1536 as an outgroup. Bootstrap values were calculated on the basis of 100  
133 replicates.

134 To evaluate the ecological distribution of this novel lineage, we queried the ITS-1  
135 sequences of isolates obtained from this study against GenBank nr (non-redundant) database  
136 using BLASTn and modified the output to display 5000 instead of the default 100 aligned  
137 sequences. Sequence similarity cutoff of 95% was used to filter the BLASTn output. The  
138 phylogenetic position of sequences with significant similarity ( $\geq 95\%$ ) was evaluated by inserting  
139 into ITS-1 reference phylogenetic trees.

140 **Data and culture accession.** Sequences generated in this study are deposited in GenBank under  
141 accession numbers MW694896-MW694898. Cultures are available at Oklahoma State  
142 University, Department of Microbiology and Molecular Genetics culture collection. Genus and  
143 species information has been deposited in Mycobank under the ID number MB838953 and  
144 MB838954, respectively.

145

## Results

146 **Isolation.** Multiple colony morphologies were obtained in roll tubes derived from enrichments of  
147 the feces of a wild blackbuck antelope. One colony type showed little morphological  
148 resemblance to currently described taxa, and its distinctness was confirmed by microscopic and  
149 phylogenetic analysis (see below). Four isolates (BB-12, BB-14, BB-2, BB-3) were examined,  
150 and all showed identical morphological and microscopic attributes. One isolate (strain BB3) was  
151 chosen as the type strain for detailed characterization.

152 **Morphology.** On solid media, strain BB-3 formed white compact circular uniform colonies that  
153 lacked a darker central core of sporangial structures, often observed with monocentric AGF  
154 genera (Figure 1a). Colony size ranged from 2-4 mm. In liquid media, strain BB-3 forms a loose  
155 thin white biofilm-like growth (Figure 1b).

156 **Microscopic features.** Strain BB-3 produces globose zoospores (Figure 2a-b), with an average  
157 diameter of 7.5  $\mu\text{m}$  (range: 6-10  $\mu\text{m}$ ). The majority of zoospores were monoflagellated (Figure  
158 2a), although biflagellated zoospores were occasionally observed (Figure 2b). Flagellum length  
159 ranged between 15-30  $\mu\text{m}$ . Upon germination, zoospores contents migrated into the germ tube  
160 and the remaining empty zoospore cyst had no further function in the thallus development. This  
161 is in contrast to the zoospore cyst of monocentric genera that either enlarges into sporangia or  
162 develops a sporangiophore with a sporangium at the end (Ho and Barr, 1995). The germ tube  
163 eventually germinated to produce extensively branched polycentric thalli with nucleated  
164 filamentous rhizomycelium. The nucleated rhizomycelium produced multiple sporangia, giving  
165 rise to a polycentric thallus of indeterminate length (Figure 2c-f). During early thallus  
166 development, the hyphal tips started to swell forming spherical vesicles (Figure 2g), from which  
167 multiple sporangiophores arose (Figure 2h-i). Each sporangiophore had a single sporangium at



168 its end (Figure 2c, d, i-k). In many cases, sporangia developed directly on the spherical vesicles  
169 without sporangiophores (Figure 2l-m). In rare occasions, strain BB-3 produced thalli with single  
170 sporangia (Figure 2n-o). Sporangia were mainly ovoid and ranged in size between 15–90  $\mu\text{m}$  L x  
171 10–55  $\mu\text{m}$  W (Figure 2i-o). Upon maturity, basal walls were formed to separate the mature  
172 sporangia from the sporangiophores (Figure 2j-k). Old cultures appeared to progressively lose  
173 the ability to produce sporangia and only produced sporangiophores initials (Figure 2l), a distinct  
174 feature that was observed in old *Orpinomyces* cultures (Ho and Barr, 1995). Zoospores were  
175 released through a wide apical pore at the top of the sporangia, with the sporangial wall staying  
176 intact after the discharge (Figure 2r). Similar to the majority of polycentric AGF genera, strain  
177 BB-3 culture lost its zoosporogenesis ability due to frequent sub-culturing and started to produce  
178 sterile sporangia that did not differentiate into zoospores.

179 **Substrate utilization.** Strain BB-3 was able to utilize a wide range of substrates as the sole  
180 carbon and energy source (Table 1). The monosaccharides glucose, xylose, mannose, and  
181 fructose all supported growth, whereas glucuronic acid, arabinose, ribose, and galactose failed to  
182 sustain the viability of strain BB-3 cultures. Strain BB-3 was able to utilize all disaccharides  
183 tested including cellobiose, sucrose, maltose, trehalose, and lactose. Out of the polymers tested,  
184 strain BB-3 was able to grow only on cellulose, xylan, starch, and raffinose, but not inulin, poly-  
185 galacturonate, chitin, alginate, pectin, peptone, and tryptone (Table 1).

186 **Phylogenetic analysis and ecological distribution.** The D1/D2 regions of strain BB-3 showed  
187 very low intra-strain sequence divergence (0-0.25%), and length (778-780 bp) heterogeneity.  
188 Similarly, the ITS1 region of strain BB-3 showed low intra strain sequence divergences (0-  
189 0.38%), and length (263-264 bp) heterogeneity. The ITS1 and D1/D2-LSU regions from strain  
190 BB-3 were 100% similar to sequences assigned to the uncultured lineage RH5 obtained in a

191 previous culture-independent diversity survey from the same sample on which isolation was  
192 conducted (blackbuck deer), as well as few other samples (aoudad sheep, domesticated sheep,  
193 and Axis deer), demonstrating that these newly obtained isolates are cultured representatives of  
194 the RH5 lineage (Hanafy et al., 2020a).

195 In D1/D2 LSU trees, strain BB-3 formed a distinct cluster, within a broader supra-genus clade  
196 comprising the genera *Orpinomyces*, *Pecoromyces*, *Ghazallomyces*, *Neocallimastix*, *Feramyces*,  
197 and *Aestipascuomyces* (Figure 3a). D1/D2 LSU sequence divergences between strain BB-3 and  
198 its closest relatives in these lineages were 93.5% to *Orpinomyces joyonii* strain D3A, 91.05% to  
199 *Pecoromyces ruminantium* strain S4B, 92.32% to *Ghazallomyces constrictus* strain AXS31,  
200 92.6% to *Neocallimastix cameroonii* strain G3, 91.2% to *Feramyces austinii* strain DS10, and  
201 89.43% to *Aestipascuomyces dupliciliberans* strain A252. In ITS1 trees, the closest relatives  
202 were members of the genera *Orpinomyces*, *Pecoromyces*, *Ghazallomyces*, *Neocallimastix*,  
203 *Feramyces*, *Aestipascuomyces*, *Joblinomyces*, and *Agriosomyces* (Figure 3b). The closest  
204 cultured representative based on ITS1 sequence similarity was *Joblinomyces apicalis* strains  
205 GFH681 and SFH683 (81.25% similarity). Interestingly, strain BB-3 ITS1 sequence showed  
206 95.2% similarity to an isolate described as *Anaeromyces* sp. strain W-98 (GenBank accession  
207 number AY091485), but no publication or documentation on the fate of that isolate is available.

208

## Discussion

209 Strain BB-3 represents the first cultured representative of the RH5 lineage, and would constitute  
210 the twentieth described genus within the phylum Neocallimastigomycota. In addition to its  
211 distinct phylogenetic position in AGF D1/D2 LSU and ITS1 trees (Figure 3a &b), strain BB-3  
212 possesses multiple unique morphological and microscopic characteristics that differentiates it  
213 from all described AGF genera. Strain BB-3 exhibits a polycentric thallus growth pattern, in  
214 which the zoospore contents completely migrate into the germ tube that eventually develops into  
215 a nucleated rhizomycelium capable of producing multiple sporangia per thallus. This thallus  
216 development pattern has been encountered only in the AGF genera *Anaeromyces* (Breton et al.,  
217 1990), *Orpinomyces* (Barr et al., 1989), and *Cyllamyces* (Ozkose et al., 2001). However, there  
218 are several key morphological and microscopic features that clearly differentiate strain BB-3  
219 from other polycentric AGF genera. For example, strain BB-3 has a filamentous rhizomycelium,  
220 distinguishing it from the characteristic bulbous rhizomycelium of the genus *Cyllamyces*.  
221 Compared to *Orpinomyces* spp., strain BB-3 exhibits a thin and loose biofilm-like growth in  
222 liquid media, and produces small compact colonies (2-4 mm), unlike the cottony growth pattern  
223 and the large (usually >1 cm diam.) colonies characteristic of *Orpinomyces* spp. Microscopically,  
224 strain BB-3 produces monoflagellated, occasionally biflagellated, zoospores in contrast to the  
225 polyflagellated *Orpinomyces* zoospores. Compared to *Anaeromyces* spp., strain BB-3 produces a  
226 non-constricted hyphae and ovoid sporangia, unlike members of *Anaeromyces* spp. that are  
227 known to produce constricted sausage-shaped hyphae and mucronate sporangia.

228 A diagnostic characteristic of strain BB-3 is the formation of spherical vesicles (swellings  
229 at the hyphal tips) (Figure 2g-h) from which multiple sporangia are formed either directly on the  
230 spherical vesicles (Figure 2l-m) or at the end of a sporangiophore (Figure 2j-k). Such feature has

231 rarely been observed in previously-reported taxa. Notably, a single isolate designated *Piromyces*  
232 *polycephalus* and isolated from the rumen fluid of water buffalo, was found to display a similar  
233 sporangial development pattern (Figures 3 and 4 in (Chen YC, 2002)). The proposed affiliation  
234 with the genus *Piromyces* implies a monocentric growth pattern, although the pictures do not  
235 clearly show the growth pattern and nuclear localization. Unfortunately, the absence of extant  
236 culture of *P. polycephalus* prevents further investigation into this issue. Also, lack of sequence  
237 data for *P. polycephalus* precluded our full understanding of the phylogenetic relationship  
238 between *P. polycephalus* and strain BB-3.

239 D1/D2 LSU sequences representing lineage RH5 were identified in one recent culture-  
240 independent diversity survey, where it was encountered in 10/31 fecal animal samples, and  
241 constituted >10% in only two samples (a domesticated sheep and a wild blackbuck antelope)  
242 (Hanafy et al., 2020a). RH5 sequences were identified in foregut fermenters (9 out of 10  
243 samples), with a 0.2% relative abundance in miniature Donkey samples, the sole hindgut animal  
244 that harbored this lineage. ITS1 sequences similar to the RH5 lineage were also identified in four  
245 zoo-housed animals including American Bison, Llama, Sable Antelope, and Western tufted deer  
246 with a relative abundance of 0.03%, 1.2%, 18.93%, and 0.03% respectively. These sequences  
247 originated from a previous culture-independent survey conducted on zoo-housed animals  
248 (Liggenstoffer et al., 2010). Collectively, this pattern suggests a limited global distribution of  
249 lineage RH5 in the herbivorous gut, and a clear preference to ruminants over hindgut fermenters.  
250 However, studies on anaerobic gut fungal diversity are relatively sparse, localized, and lack  
251 spatiotemporal dimensions. As such, these observations should be regarded as preliminary, and  
252 more in-depth sampling and diversity assessment efforts are needed to confirm, disprove, or  
253 identify additional patterns governing the distribution of this lineage.

254           Thallus development pattern is a key feature used in the classification of the basal fungal  
255 lineages including the Neocallimastigomycota. Strain BB-3 exhibited a classical polycentric  
256 thallus growth, i.e. multiple sporangia per thallus. This growth pattern is associated with  
257 migration of the nucleus out of the zoospore into the germ tube, which elongates and branches  
258 into rhizomycelium. Within the rhizomycelium, repeated nuclear divisions occur and nuclei  
259 migrate into individual hyphae, resulting in a fungal thallus of unlimited extent and with multiple  
260 sporangia. Such pattern is in contrast to the monocentric thallus growth (single sporangium per  
261 thallus), where the rhizoid is devoid of nuclei and the thallus is of determinate extent with a  
262 single sporangium (Hess et al., 2020; Ho and Barr, 1995). It is worth noting that the presence of  
263 multiple sporangia per thallus is a hallmark of polycentric growth. However, some monocentric  
264 genera such as *Caecomyces communis*, *Piromyces polycephalus*, *Khyollomyces ramosus* produce  
265 branched sporangiophores with two or more sporangia resulting in a multi-sporangiate thallus  
266 (Chen YC, 2002; Hanafy et al., 2020b; Ho and Barr, 1995). In addition to the  
267 Neocallimastigomycota (Ho and Barr, 1995), polycentric growth pattern is known to occur in  
268 several basal fungal lineages, e.g. the genera *Nowakowskiella* and *Cladochytrium* in the phylum  
269 Chytridiomycota (Barr, 1978). Phylogenetic analysis shows that polycentric genera are  
270 polyphyletic within the Neocallimastigomycota, suggesting that multiple events of  
271 acquisition/loss of this trait has occurred throughout Neocallimastigomycota evolution and  
272 obscuring the nature of the AGF last common ancestor. The genetic and epigenetic determinants  
273 of this phenotypic pattern is yet unclear, hindered by the absence of genome representatives from  
274 most of the currently described AGF genera (Solomon et al., 2016; Youssef et al., 2013).  
275 Similarly, the niche preference of polycentric versus monocentric taxa, and correlation between  
276 such growth pattern and ecological distribution is murky. It is notable that prior studies have

277 suggested that all previously described polycentric genera (*Anaeromyces*, *Orpinomyces*, and  
278 *Cyllamyces*) appear to exhibit a distribution pattern where they are present in the majority of  
279 examined animals, but often in low relative abundance. In contrast, RH5 appear to have a much  
280 more limited distribution, but could represent a majority of the community in rare cases (Hanafy  
281 et al., 2020a; Liggenstoffer et al., 2010).

282 Based on morphological, physiological, microscopic, and phylogenetic characteristics,  
283 we propose accommodating these new isolates into a new genus, for which the name *Paucimyces*  
284 *polynucleatus* is proposed. The type strain is *Paucimyces polynucleatus* strain BB-3.

#### 285 TAXONOMY

286 ***Paucimyces***. Radwa A. Hanafy, Noha H. Youssef, and Mostafa Elshahed, gen. nov.

287 Mycobank accession number: MB838953

288 *Typification*: *Paucimyces polynucleatus* Radwa A. Hanafy, Noha H. Youssef, and Mostafa  
289 Elshahed

290 *Etymology*: *Pauci* = derived from the Latin word for few, reflecting its relatively limited  
291 distribution in nature; *myces* = the Greek name for fungus.

292 Obligate anaerobic fungus that produces polycentric thallus with highly branched nucleated  
293 rhizomycelium of indeterminate length. The fungus is characterized by formation of spherical  
294 vesicles at the hyphal tips. Multiple sporangia are developed either directly on the spherical  
295 vesicles or the end of sporangiophores. Mature sporangia are separated from the sporangiophores  
296 by basal walls. Old cultures produce sporangiophore initials with no sporangia. Zoospores are  
297 mainly monoflagellated . Bi-flagellated zoospores are occasionally encountered. Frequent sub-  
298 culturing results in cultures that lose the zoosporogenesis ability and produce sterile sporangia.

299 The clade is defined by the sequence MW694896 (for ITS1, 5.8S rDNA, ITS2, D1-D2 28S

300 rDNA). The most genetically similar genera are *Orpinomyces*, which is characterized by its  
301 polyflagellated zoospores and polycentric thallus that produce sporangia that are either terminal  
302 or intercalary, and *Joilinomyces*, which is defined as producing monocentric thalli and  
303 monoflagellated zoospores.

304 ***Paucimyces polynucleatus*** Radwa A. Hanafy, Noha H. Youssef, and Mostafa Elshahed  
305 Mycobank accession number: MB838954.

306 *Typification*: The holotype (Figure 2c) was derived from the following: U.S.A. OKLAHOMA:  
307 Stillwater, 36.12°N, 97.06°W, ~300 m above sea level, 3-d old culture, isolated from frozen fecal  
308 samples of a wild blackbuck antelope (*Antelope cervicapra*) in December 2020 by Radwa  
309 Hanafy. Ex-type culture BB-3 is stored on solid agar media at 39°C at Oklahoma State  
310 University. GenBank accession number MW694896 (for ITS1, 5.8S rDNA, ITS2, D1-D2 28S  
311 rDNA).

312 *Etymology*: The species epithet (***polynucleatus***) reflects the polynucleated filamentous  
313 rhizomycelium produced during growth.

314 An obligate anaerobic fungus that produces globose (6-10 µm in diameter) monoflagellated  
315 zoospores. Biflagellated zoospores are occasionally observed. Flagellum length ranges from 15-  
316 30 µm. Zoospores germinate into polycentric thalli with extensively branched nucleated  
317 rhizomycelium of indeterminate extent. Spherical vesicles are developed at the hyphal tips, and  
318 multiple sporangia are developed directly on the spherical vesicles or at the end of  
319 sporangiophores. Sporangia are mainly ovoid and ranged in size between (15–90 µm L) X (10–  
320 55 µm W). Old cultures produce empty sporangiophores initials. Also, prolonged sub-culturing  
321 results in sterile sporangia that fail to differentiate into zoospores. Cultures grown in cellobiose  
322 liquid media exhibit a thin loose biofilm-like growth and form white compact circular

323 filamentous colonies (2-4 mm diameter) on agar roll tubes. The clade is defined by the sequence  
324 MW694896 (for ITS1, 5.8S rDNA, ITS2, D1-D2 28S rDNA).

325 *Additional specimens examined:* U.S.A. OKLAHOMA: Stillwater, 36.12°N, 97.06°W at ~300 m  
326 above sea level, isolated from frozen fecal samples of a wild blackbuck antelope (*Antilope*  
327 *cervicapra*), in December 2020 by Radwa Hanafy. These cultures are named BB-2, BB-12, and  
328 BB-14.

329 **Acknowledgments.** This work has been supported by NSF grant 2029478 to NHY and MSE.



330 **Tables**

331 Table 1. Substrate utilization pattern of *Paucimyces polynucleatus* strain BB-3.

| Substrate       | Growth <sup>a</sup> |   |
|-----------------|---------------------|---|
| Polysaccharides | Cellulose           | + |
|                 | Xylan               | + |
|                 | Starch              | + |
|                 | Raffinose           | + |
|                 | Inulin              | - |
|                 | Poly-galacturonate  | - |
|                 | Chitin              | - |
|                 | Alginate            | - |
|                 | Pectin              | - |
| Disaccharides   | Cellobiose          | + |
|                 | Succrose            | + |
|                 | Maltose             | + |
|                 | Trehalose           | + |
|                 | Lactose             | + |
| Monosaccharides | Glucose             | + |
|                 | Xylose              | + |
|                 | Mannose             | + |
|                 | Fructose            | + |
|                 | Glucuronic acid     | - |
|                 | Arabinose           | - |
|                 | Ribose              | - |
| Peptides        | Galactose           | - |
|                 | Peptone             | - |
|                 | Tryptone            | - |

332 a: +, Growth was observed following three consecutive subcultures; -, No growth was observed

333 with the carbon source.

334 **Figure legends.**

335 **Figure 1.** Macroscopic features of *Paucimyces polynucleatus* strain BB-3. (a) Thin and loose  
336 fungal biofilm-like growth in liquid cellobiose rumen fluid medium. (b) White, circular compact  
337 colony on cellobiose agar roll tube.

338 **Figure 2.** Microscopic features of *Paucimyces polynucleatus* strain BB-3. Light (a, b, h, and j-p),  
339 confocal (c-g), and scanning electron (i and q) micrographs are shown. Overlay images are  
340 shown in d and f. (a) A monoflagellated zoospore. (b) A biflagellated zoospore. (c-f) Polycentric  
341 thalli, with nuclei present in the rhizomycelium. Note the nucleated zoospores inside the mature  
342 sporangia (arrows). (g) Early thallus development stage starts by swelling of the hyphal tip  
343 forming a spherical vesicle (SV) and developing immature sporangia (S) (arrows). (h) Multiple  
344 sporangiophores (Sp) develop on the spherical vesicle (SV). (i) A mature thallus with multiple  
345 sporangia. (j-k) Ovoid sporangia developing at apices of sporangiophores (Sp), note the basal  
346 wall separating mature sporangia from the sporangiophores (arrows). (l-m) Sporangia developing  
347 directly on the spherical vesicles (SV). (n-o) Mature thalli with single ovoid sporangium. (p) An  
348 old culture producing empty sporangiophore initials (arrows). (q) An empty sporangium after  
349 zoospores release through a wide apical pore, with sporangial wall staying intact.

350 Bar: a, b, and l= 20  $\mu\text{m}$ , c-h, j,k, m-p= 50  $\mu\text{m}$ , i and q= 100  $\mu\text{m}$

351 **Figure 3.** Phylogenetic affiliation of the *Paucimyces* clade to other AGF genera based on the  
352 sequences of (A) D1–D2 LSU and (B) ITS-1 sequences. Sequences were aligned in MAFFT  
353 (Kato et al., 2019) and the alignments were used to construct maximum likelihood trees in  
354 FastTree using the GTR model. using *Chytriomycetes* sp. WB235A isolate AFTOL-ID 1536 was  
355 used as the outgroup. Bootstrap values (from 100 replicates) are shown for nodes with more than  
356 50% bootstrap support.

357 **References**

- 358 Barr, D.J., KudO, H., Jakober, K.D., Cheng, K.J., 1989. "Morphology and development of rumen  
359 fungi: *Neocallimastix* sp., *Piromyces communis*, and *Orpinomyces bovis* gen.nov.,  
360 sp.nov.". Can. J. Bot. 67 2815–2824
- 361 Barr, D.J.S., 1978. Taxonomy and phylogeny of chytrids. Biosystems 10, 153-165.
- 362 Breton, A., Bernalier, A., Dusser, M., Fonty, G., Gaillard-Martinie, B., Guitlot, J., 1990.  
363 *Anaeromyces mucronatus* nov. gen., nov. sp., a new strictly anaerobic rumen fungus with  
364 polycentric thallus. FEMS Microbiol. Lett. 70, 177-182.
- 365 Calkins, S., Elledge, N.C., Hanafy, R.A., Elshahed, M.S., Youssef, N.H., 2016. A fast and  
366 reliable procedure for spore collection from anaerobic fungi: Application for RNA uptake  
367 and long-term storage of isolates. J. Microbiol. Meth. 127, 206-213.
- 368 Callaghan, T.M., Podmirseg, S.M., Hohlweck, D., Edwards, J.E., Puniya, A.K., Dagar, S.S.,  
369 Griffith, G.W., 2015. *Buwchfawromyces eastonii* gen. nov., sp. nov.: a new anaerobic  
370 fungus (Neocallimastigomycota) isolated from buffalo faeces. Mycokeys 9, 11-28.
- 371 Chen YC, H.R., Chien CY, 2002. *Piromyces polycephalus* (Neocallimasticaceae), a new rumen  
372 fungus. Nova Hedwigia 75, 409–414.
- 373 Dagar, S.S., Kumar, S., Griffith, G.W., Edwards, J.E., Callaghan, T.M., Singh, R., Nagpal, A.K.,  
374 Puniya, A.K., 2015. A new anaerobic fungus (*Oontomyces anksri* gen. nov., sp. nov.)  
375 from the digestive tract of the Indian camel (*Camelus dromedarius*). Fungal Biol. 19,  
376 731-737.
- 377 Gold, J.J., Heath, I.B., Bauchop, T., 1988. Ultrastructural description of a new chytrid genus of  
378 caecum anaerobe, *Caecomyces equi* gen. nov., sp. nov., assigned to the  
379 Neocallimasticaceae. BioSystems 21 403– 415.

- 380 Gruninger, R.J., Puniyab, A.K., Callaghanc, T.M., Edwardsc, J.E., Youssef, N., Dagare, S.S.,  
381 Fliegerova, K., Griffith, G.W., Forster, R., Tsang, A., McAllister, T., Elshahed, M.S.,  
382 2014. Anaerobic Fungi (Phylum Neocallimastigomycota): Advances in understanding of  
383 their taxonomy, life cycle, ecology, role, and biotechnological potential. FEMS  
384 Microbiol. Ecol.
- 385 Hanafy, R.A., Elshahed, M.S., Liggenstoffer, A.S., Griffith, G.W., Youssef, N.H., 2017.  
386 *Pecoramycetes ruminantium*, gen. nov., sp. nov., an anaerobic gut fungus from the feces of  
387 cattle and sheep. Mycologia 109, 231-243.
- 388 Hanafy, R.A., Elshahed, M.S., Youssef, N.H., 2018. *Feramyces austinii*, gen. nov., sp. nov., an  
389 anaerobic gut fungus from rumen and fecal samples of wild Barbary sheep and fallow  
390 deer. Mycologia 110, 513-525.
- 391 Hanafy, R.A., Johnson, B., Youssef, N.H., Elshahed, M.S., 2020a. Assessing anaerobic gut  
392 fungal diversity in herbivores using D1/D2 large ribosomal subunit sequencing and  
393 multi-year isolation. Environ Microbiol 22, 3883-3908.
- 394 Hanafy, R.A., Lanjekar, V.B., Dhakephalkar, P.K., Callaghan, T.M., Dagar, S.S., Griffith, G.W.,  
395 Elshahed, M.S., Youssef, N.H., 2020b. Seven new Neocallimastigomycota genera from  
396 fecal samples of wild, zoo-housed, and domesticated herbivores greatly expand the  
397 taxonomic diversity of the phylum. Mycologia 112, 1212-1239.
- 398 Heath, B.I., Bauchop, T., Skipp, R.A., 1983. Assignment of the rumen anaerobe *Neocallimastix*  
399 *frontalis* to the Spizellomycetales (Chytridiomycetes) on the basis of its polyflagellate  
400 zoospore ultrastructure. Can. J. Bot. 61, 295-307.
- 401 Hess, M., Paul, S.S., Puniya, A.K., van der Giezen, M., Shaw, C., Edwards, J.E., Fliegerová, K.,  
402 2020. Anaerobic Fungi: Past, Present, and Future. Front Microbiol 11, 584893-584893.

- 403 Ho, Y., Barr, D., 1995. Classification of anaerobic gut fungi from herbivores with emphasis on  
404 rumen fungi from Malaysia. *Mycologia* 87, 655-677.
- 405 Hungate, R.E., 1969. A roll tube method for cultivation of strict anaerobes, in: Norris, J.R.,  
406 Ribbons, D.W. (Eds.), *Methods Microbiol.* Academic Press, pp. 117-132.
- 407 Joshi, A., Lanjekar, V., Dhakephalkar, P., Callaghan, T., Griffith, G., Dagar, S., 2018.  
408 *Liebetanzomyces polymorphus* gen. et sp. nov., a new anaerobic fungus  
409 (Neocallimastigomycota) isolated from the rumen of a goat. *Mycokeys* 40, 89-110.
- 410 Katoh, K., Rozewicki, J., Yamada, K.D., 2019. MAFFT online service: multiple sequence  
411 alignment, interactive sequence choice and visualization. *Briefings in Bioinformatics* 20,  
412 1160-1166.
- 413 Kittelmann, S., Naylor, G.E., Koolaard, J.P., Janssen, P.H., 2012. A proposed taxonomy of  
414 anaerobic fungi (Class Neocallimastigomycetes) suitable for large-scale sequence-based  
415 community structure analysis. *PLOS ONE* 7, e36866.
- 416 Ligginstoffer, A.S., Youssef, N.H., Couger, M.B., Elshahed, M.S., 2010. Phylogenetic diversity  
417 and community structure of anaerobic fungi (Phylum Neocallimastigales) in ruminant  
418 and non-ruminant herbivores. *ISME J.* 4 1225–1235.
- 419 Ozkose, E., Thomas, B.J., Davies, D.R., Griffith, G.W., Theodorou, M.K., 2001. *Cyllamyces*  
420 *aberensis* gen.nov. sp.nov., a new anaerobic gut fungus with branched sporangiophores  
421 isolated from cattle. *Can. J. Bot.* 79, 666-673.
- 422 Solomon, K.V., Haitjema, C.H., Henske, J.K., Gilmore, S.P., Borges-Rivera, D., Lipzen, A.,  
423 Brewer, H.M., Purvine, S.O., Wright, A.T., Theodorou, M.K., Grigoriev, I.V., Regev, A.,  
424 Thompson, D.A., O'Malley, M.A., 2016. Early-branching gut fungi possess a large,  
425 comprehensive array of biomass-degrading enzymes. *Science* 351, 1192.

- 426 Stabel, M., Hanafy, R.A., Schweitzer, T., Greif, M., H. Aliyu, Flad, V., Young, D., Lebuhn, M.,  
427 Elshahed, M.S., Ochsenreither, K., Youssef., N.H., 2020. *Aestipascuomyces*  
428 *dupliciliberans* gen. nov, sp. nov., the first cultured representative of the uncultured SK4  
429 Clade from aoudad sheep and alpaca. *Microorganisms* 8.
- 430 Wang, X., Liu, X., Groenewald, J.Z., 2017. Phylogeny of anaerobic fungi (phylum  
431 Neocallimastigomycota), with contributions from yak in China. *Antonie van*  
432 *Leeuwenhoek* 110, 87-103.
- 433 Youssef, N.H., Couger, M.B., Struchtemeyer, C.G., Liggenstoffer, A.S., Prade, R.A., Najjar, F.Z.,  
434 Atiyeh, H.K., Wilkins, M.R., Elshahed, M.S., 2013. Genome of the anaerobic fungus  
435 *Orpinomyces* sp. C1A reveals the unique evolutionary history of a remarkable plant  
436 biomass degrader *Appl. Environ. Microbiol.* 79, 4620-4634.
- 437

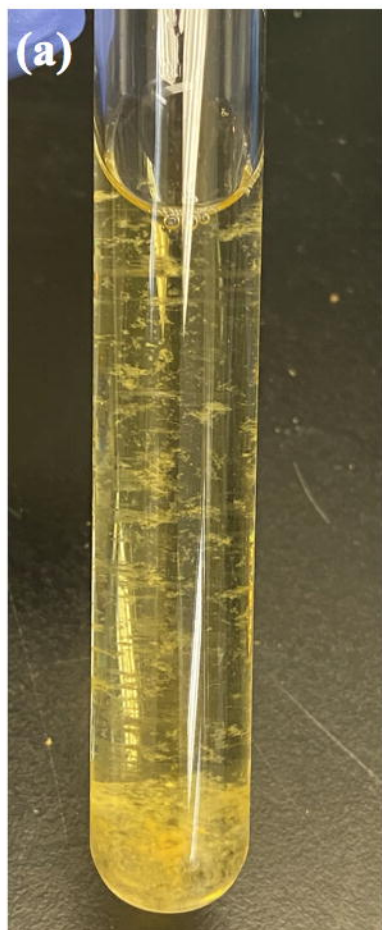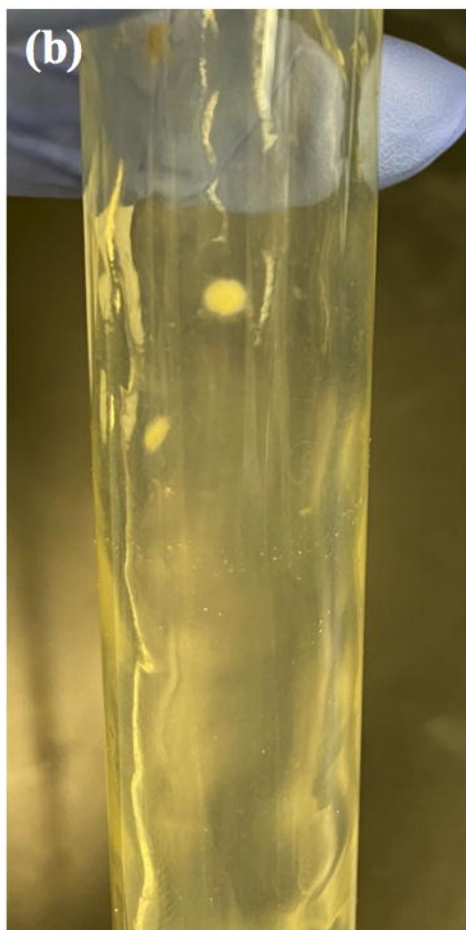

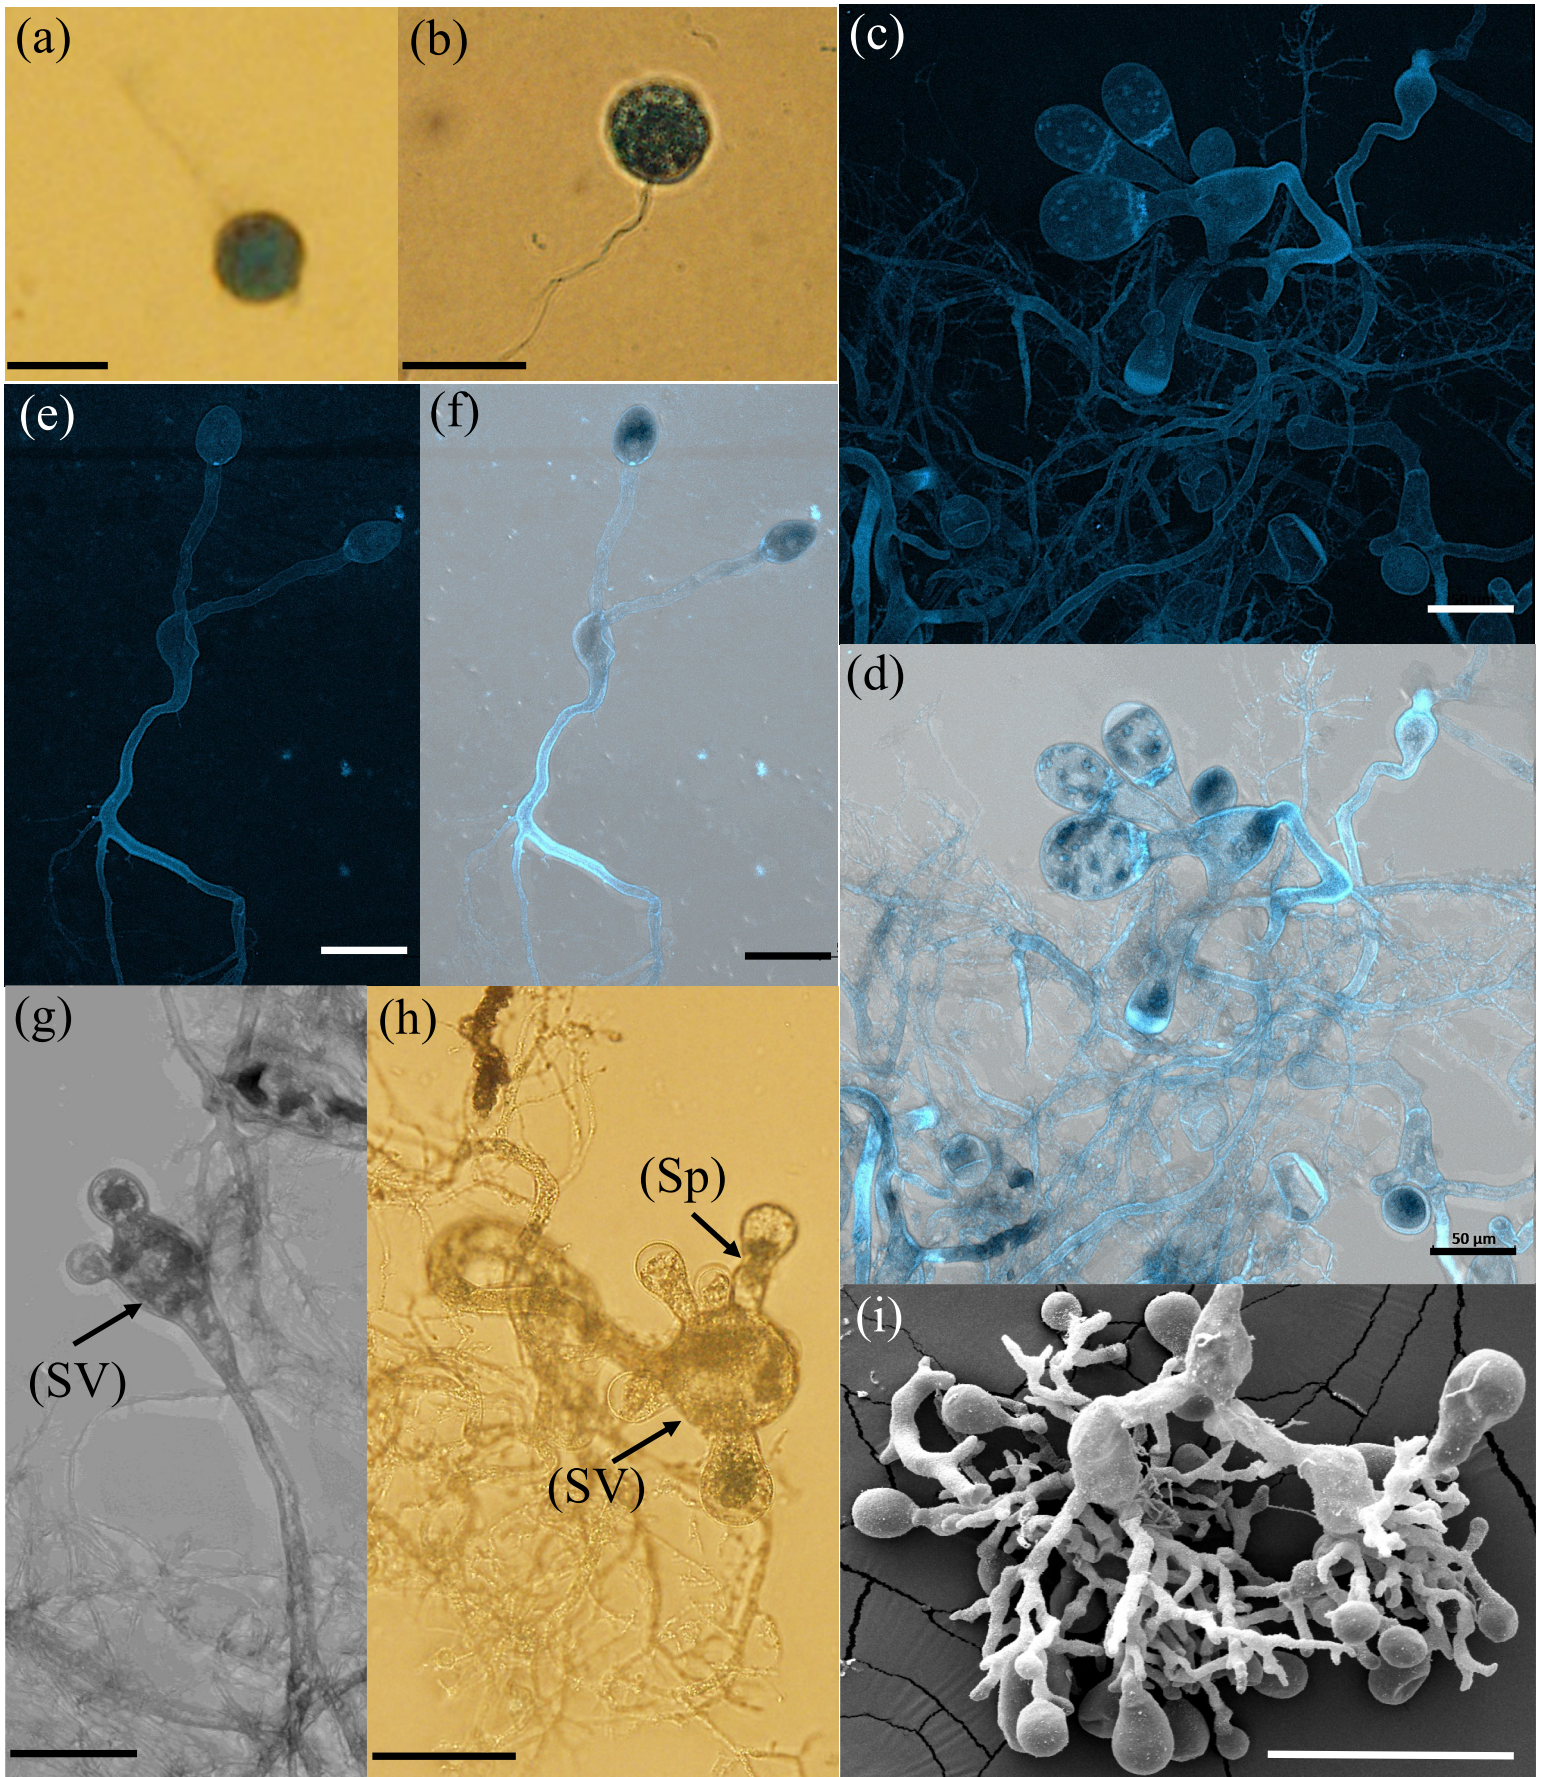



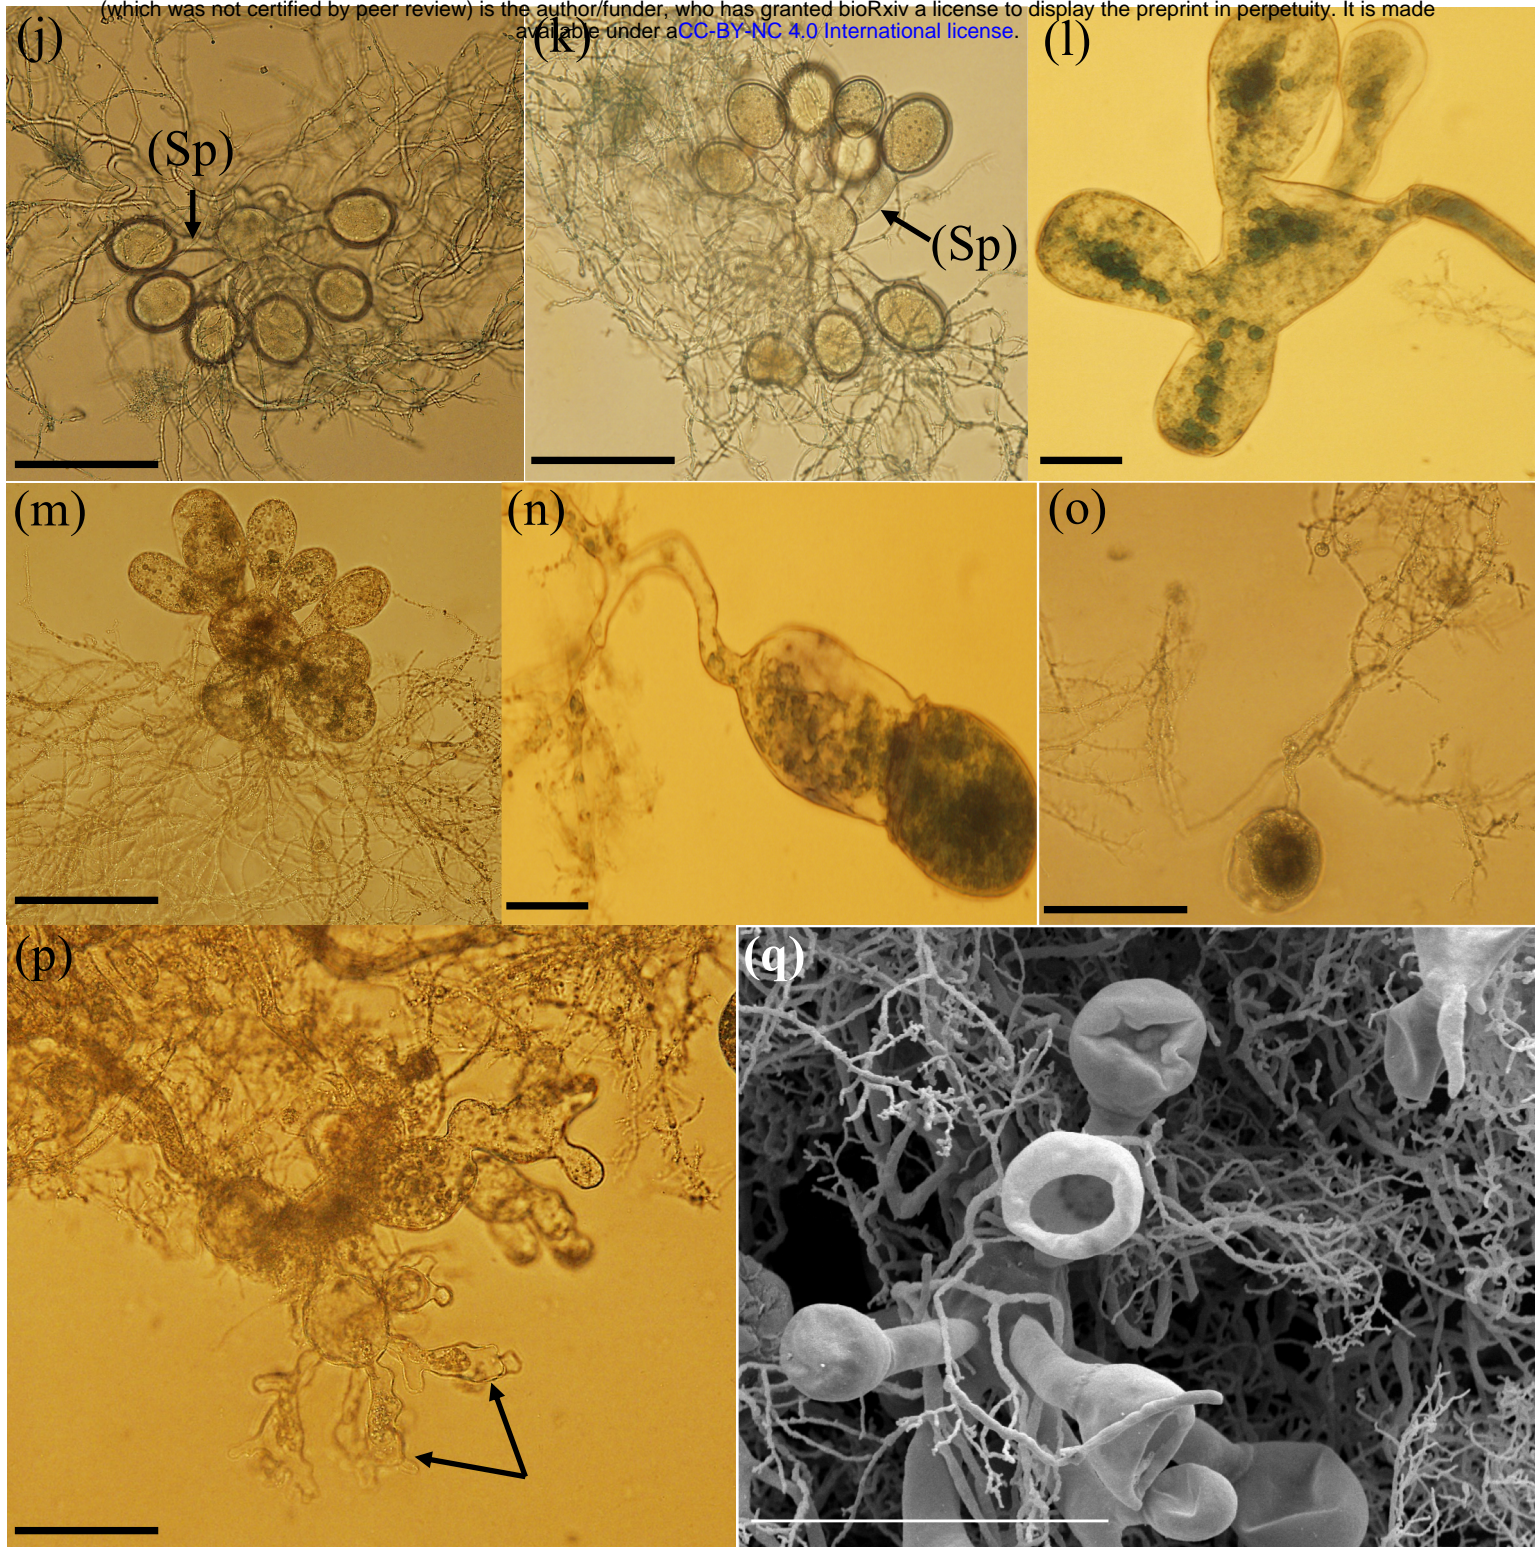

A

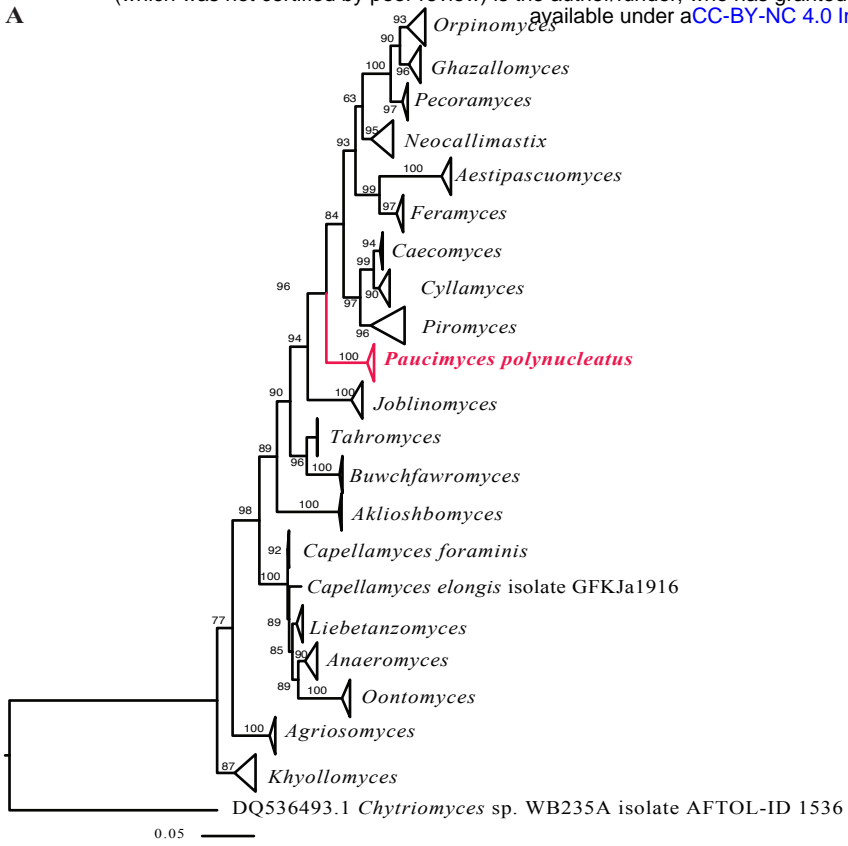

B

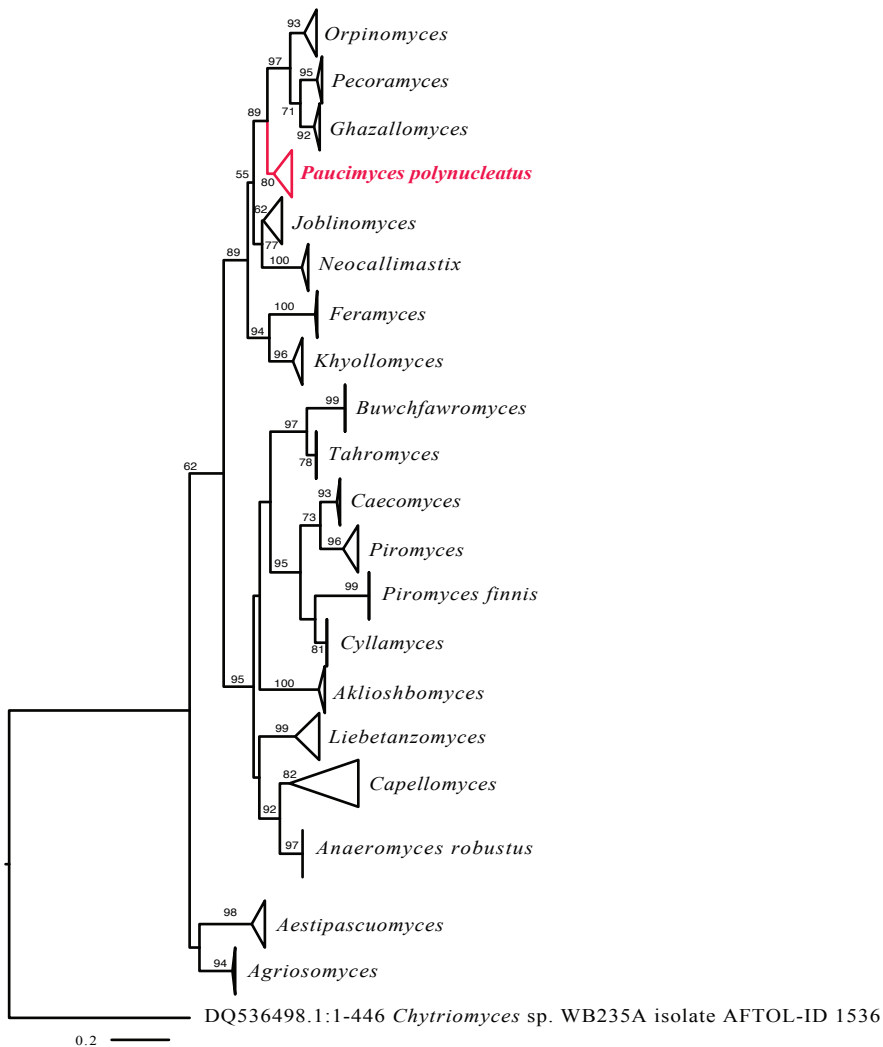

Source: https://www.biorxiv.org/content/10.1101/2021.03.04.433954v1.full.pdf
